# Supplementary material for: Genome-Wide Identification and Expression Analysis of BraGLRs Reveal Their Potential Roles in Abiotic Stress Tolerance and Sexual Reproduction
Source: MDPI journal article supplement (doi:10.3390/cells11233729), 2022-11-22
Supplement: s1 [file s1]

**Table S1.** The primers used in the qRT-PCR.

| <b><i>BraGLR</i> name</b> | <b>Forward primer (5'-3')</b> | <b>Reverse primer (5'-3')</b> |
|---------------------------|-------------------------------|-------------------------------|
| <i>BraGLR1</i>            | GTGTTCAATTCACAGCGTTAGAC       | CTTGTAAGAGATCTTGCATCGC        |
| <i>BraGLR2</i>            | AAACTAATGACCATGCCCACTA        | CGATATTGGAGATACGCTAGCT        |
| <i>BraGLR3</i>            | TGGCTTTCGGTTACCTTAGATT        | TGTGAATTGGTGCATCTTTACG        |
| <i>BraGLR4</i>            | TCTGGTGATTTCCGGTTTATCA        | CCATATGATTGGTCTGAGTCGA        |
| <i>BraGLR5</i>            | CTATGGATCTCTTGCAAGGAGT        | TGAAGAAAACCTCAAGAGCACG        |
| <i>BraGLR6</i>            | TACATCCATTGCTAATGCGTTG        | GAGCCACACATATTCATTGGTC        |
| <i>BraGLR7</i>            | GAGCTTAGACCTATGGATCACC        | GTTGACTCTATGTTTCAACAGC        |
| <i>BraGLR8</i>            | ATCAACGGTCAGTTTTAAAGGC        | TCCTAACCTCTTCACTAGTCCA        |
| <i>BraGLR9</i>            | TAGTCTCACATCAATCCTGACG        | GAAGAGTTCAACATAAGGACGC        |
| <i>BraGLR10</i>           | GAGTCTCGTGTAATCATTGTGC        | AATCTTCTTGGGAGGTAAAGGG        |
| <i>BraGLR11</i>           | ACCTTATGCAGTTCCCTATGAG        | CATTGGAACCTAACTTCCGAAC        |
| <i>BraGLR12</i>           | AATGAACGATGTAAACGCTGAC        | GAATCCACTGCAGTTAGAGTCT        |
| <i>BraGLR13</i>           | ATCAAAGACTTGTTGGTTTCCG        | CCGTTGATATCCAAACGTAACC        |
| <i>BraGLR14</i>           | GTCATTCCTCAATACGGTTTTCG       | GAAATCAACATACCGTGACCTG        |
| <i>BraGLR15</i>           | CTTCAAGACGGCTGGTTTTAAA        | TCAAGATAGCCCTTGAGACATC        |
| <i>BraGLR16</i>           | TGGAGATGAAGAGCGGATTATC        | CGTTGTGGTTGTTACCTTACTG        |
